# Supplementary material
Source: publisher figshare collection journal article supplement (https://gsapubs.figshare.com/articles/dataset/_/15138612)
Supplement: Supplementary file 1 [file 1]

## Sheet: Table 1 
Chunjiang Wang & Henk Visscher - A molecular biomarker for end-Permian plant extinction in South China - Table S1 (Data File)
Sample number	Depth (m)	Strata	Lithological chracteristics	TOC (%)	HI (HCs mg / g TOC)	d13Corg (‰, V-PDB)	H/C	Phenols/n-alka(e)nes (PY-GC-MS)	Phenols/n-alka(e)nes (PY-GC)	Phenols/n-alka(e)nes (average)	DBFs/aromatics	Moretane/hopnane	MADAO/n-alkanes
C59-1	13	Induan / Yinkeng Fm	light gray marl	0.04	133.843	-26.4	NM	NM	NM	NM	0.0772731	0.307249	0
C56-2	11.8	Induan / Yinkeng Fm	light gray marl	0.05	100.251	-25	NM	NM	NM	NM	0.0619419	0.320067	0
C56-1	11.5	Induan / Yinkeng Fm	dark gray mudstone	1.05	130.275	-27.6	NM	0.28	NM	0.28	0.0954996	0.547024	0.0150272
C47-1	7.5	Induan / Yinkeng Fm	dark gray mudstone	1.06	148.182	-29.4	NM	0.4	NM	0.4	0.0820175	0.681817	0.0254959
C42-1	4.5	Induan / Yinkeng Fm	dark gray mudstone	0.64	86.5672	-29.1	NM	0.35	NM	0.35	0.168407	0.620022	0.00550136
C40-1	3.1	Induan / Yinkeng Fm	dark gray mudstone	0.72	103.634	-28.9	NM	0.3	NM	0.3	0.0748687	0.558047	0.0216231
C32	1.25	Induan / Yinkeng Fm	dark gray marly mudstone	0.3396	55.9482	-28.2	NM	0.240828	NM	0.240828	0.094657	0.416984	0.000775395
C30-2	0.93	Induan / Yinkeng Fm	dark gray marly mudstone	0.43215	64.7923	-29.2	NM	0.345259	NM	0.345259	0.173456	0.408842	0.0121971
B30-4	0.84	Induan / Yinkeng Fm	dark gray marly mudstone	0.6355	45.6334	-29.3	NM	NM	0.25	0.25	0.13503	0.35767	0.00848429
C30-1	0.75	Induan / Yinkeng Fm	light gray marl	0.1278	23.4742	-25.1	NM	NM	NM	NM	0.11417	0.158074	0.00693323
B30-1	0.65	Induan / Yinkeng Fm	light gray marl	0.0921	10.8578	-26	NM	NM	0.15	0.15	0.145379	0.143025	0.00179608
C29-3	0.52	Induan / Yinkeng Fm	dark gray marly mudstone	0.1795	33.4262	-28.1	0.577196	0.41	NM	0.413039	0.133926	0.352921	0.00539146
B29-2	0.48	Induan / Yinkeng Fm	dark gray marly mudstone	0.1588	31.4861	-27.6	NM	NM	0.2	0.2	0.191158	0.319498	0.00661115
B29-1	0.38	Induan / Yinkeng Fm	light gray marl	0.0621	16.1031	-25.8	NM	NM	0.1	0.1	0.16127	0.152823	0.00726105
C29-1	0.33	Induan / Yinkeng Fm	light gray marl	0.0623	32.1027	-26.5	NM	NM	NM	NM	0.0917167	0.14924	0.0260848
B28	0.29	Induan / Yinkeng Fm	light gray claystone	0.0757	52.8402	-26.2	NM	NM	NM	NM	0.0667924	0.124057	0.00200912
B27D	0.26	Induan / Yinkeng Fm	light gray dolomite	0.0923	10.1833	-27.1	0.790458	NM	NM	NM	0.173497	0.176707	0.00424715
C27cd	0.24	Induan / Yinkeng Fm	light gray dolomite	0.0528	NM	NM	NM	NM	NM	NM	0.108569	0.229054	0.00170754
B27C	0.21	Induan / Yinkeng Fm	light gray dolomite	0.1001	10.5597	-26.8	NM	NM	0.2	0.2	0.17618	0.23464	0.00224429
B27B	0.18	Changhsingian / Yingkeng Fm	light gray limestone	0.0803	11.4155	-26.8	NM	0.15	NM	0.15	0.140353	0.20617	0.00194265
C27ab	0.15	Changhsingian / Yingkeng Fm	light gray limestone	0.0513	NM	NM	NM	NM	NM	NM	0.100683	0.295391	0.000658818
B27A	0.13	Changhsingian / Yingkeng Fm	light gray limestone	0.0917	11.9617	-27.2	NM	NM	0.25	0.25	0.163829	0.223608	0.0059439
B26-2	0.09	Changhsingian / Yingkeng Fm	black mudstone	0.8206	35.34	-31.8	NM	0.459376	0.6	0.529688	0.205166	0.319848	0.0798743
C26	0.07	Changhsingian / Yingkeng Fm	black mudstone	0.7624	64.2105	-30.7	0.77868	0.812061	NM	0.812061	0.230381	0.395651	0.169729
B26-1	0.05	Changhsingian / Yingkeng Fm	black mudstone	0.8906	46.0364	-31.4	NM	0.750595	NM	0.750595	0.196298	0.305431	0.30215
C25	0.02	Changhsingian / Yingkeng Fm	gray claystone	0.2223	49.4827	-29.4	NM	NM	NM	NM	0.210148	0.308419	0.446448
B24e-5	-0.01	Changhsingian / Changxing Fm	gray thin-bedded micrite	0.7889	76.0553	-29	0.801199	1.74872	2.3	2.05624	0.179034	0.266112	0.326987
C24e-2	-0.015	Changhsingian / Changxing Fm	gray thin-bedded micrite	NM	NM	NM	NM	NM	NM	NM	NM	0.231563	0.347695
B24e-4	-0.02	Changhsingian / Changxing Fm	gray thin-bedded micrite	0.2401	45.8142	-28.7	NM	1.61	NM	1.61	0.226595	0.229609	0.417447
B24e-3	-0.04	Changhsingian / Changxing Fm	dark gray wackstone	0.2189	54.8196	-28.9	NM	1.90786	NM	1.90786	0.226578	0.177824	0.38493
B24e-2	-0.06	Changhsingian / Changxing Fm	dark gray wackstone	0.6339	53.4251	-28.8	NM	NM	2	2	0.248784	0.206918	0.244231
C24e-1	-0.07	Changhsingian / Changxing Fm	dark gray wackstone	NM	NM	NM	NM	NM	NM	NM	0.276028	0.186306	0.241333
B24e-1	-0.09	Changhsingian / Changxing Fm	dark gray wackstone	0.8423	94.4444	-28.7	0.797122	1.8362	1.7	1.7681	0.229694	0.219513	0.383482
D24-2	-0.24	Changhsingian / Changxing Fm	gray dolomatic micrite	0.2415	66.2526	-28.7	NM	NM	1.6	1.6	0.171591	0.142495	0.442131
D24-1	-0.51	Changhsingian / Changxing Fm	dark gray dolomatic micrite	0.3373	97.8358	-29.9	NM	NM	NM	NM	NM	0.16128	0.471069
C24-1	-0.6	Changhsingian / Changxing Fm	dark gray dolomatic micrite	0.2753	47.2212	-30	0.875472	2.15694	NM	2.15694	0.315735	0.16103	0.138034
D23-2	-1	Changhsingian / Changxing Fm	dark gray micrite	0.4753	73.6377	-29.7	NM	1.78414	1.8	1.79207	0.189627	0.0972833	0.296994
C23-2	-1.19	Changhsingian / Changxing Fm	dark gray micrite	0.0892	67.2646	-29.3	NM	2.4	NM	2.4	0.255874	0.100208	0.141345
D23-1	-1.4	Changhsingian / Changxing Fm	dark gray micrite	0.4726	97.3339	-29.2	NM	1.6	NM	1.6	0.222358	0.0979905	0.320031
C23-1	-1.64	Changhsingian / Changxing Fm	dark gray micrite	0.2	60.6061	-28.8	NM	2	NM	2	0.261915	0.0998143	0.324054
C22-1	-2.15	Changhsingian / Changxing Fm	dark gray micrite	0.11	29.703	-28	NM	NM	NM	NM	0.0812547	0.0923134	0.048798
C22	-2.51	Changhsingian / Changxing Fm	gray micrite	0.0096	36.7197	-27.3	NM	0.988272	NM	0.988272	0.122238	0.0846322	0.0457103
D22-1	-3.13	Changhsingian / Changxing Fm	dark gray micrite	0.1084	36.9004	-28	NM	0.789949	0.9	0.844974	0.134798	0.0704619	0.203525
D21	-4.86	Changhsingian / Changxing Fm	dark gray micrite	0.4705	131.775	-28.2	NM	NM	NM	NM	NM	0.0715892	0.426634
C21	-5	Changhsingian / Changxing Fm	dark gray micrite	0.2518	67.5139	-27.8	NM	0.985877	NM	0.985877	0.131606	0.0906455	0.0516851
C20	-5.2	Changhsingian / Changxing Fm	gray micrite	0.0752	26.5957	-27.5	NM	0.400945	NM	0.400945	0.0668499	0.0879366	0.0336375
D20	-6.04	Changhsingian / Changxing Fm	dark gray micrite	0.8461	125.281	-28	NM	0.71466	NM	0.71466	0.079934	0.065609	0.0625493
D19-3	-6.88	Changhsingian / Changxing Fm	dark gray micrite	0.21	72.0461	-29.6	NM	NM	NM	NM	0.112154	0.0717338	0.307687
C19	-7.25	Changhsingian / Changxing Fm	dark gray micrite	0.1879	53.2198	-28.9	NM	0.598961	NM	0.598961	0.125423	0.0752256	0.0909264
D19-2	-9.4	Changhsingian / Changxing Fm	black siliceous limestone	1.256	139.331	-29.6	NM	NM	NM	NM	0.0570778	0.0674247	0.10573
D19-1	-9.44	Changhsingian / Changxing Fm	black calcareous shale laminae	2.782	102.085	-30	NM	NM	0.15	0.15	0.0520343	0.052699	0.0640378
D18	-10.55	Changhsingian / Changxing Fm	black siliceous limestone	0.1684	77.1971	-28	NM	NM	NM	NM	0.124529	0.054639	0.0707615
D16	-14.22	Changhsingian / Changxing Fm	dark gray micritic limestone	0.3641	82.3949	-27.3	NM	0.185948	NM	0.185948	0.0640345	0.0598241	0.120422
D15-3	-15.15	Changhsingian / Changxing Fm	dark gray micritic limestone	0.3408	82.1596	-27.1	NM	NM	NM	NM	0.0631294	0.0539127	0.123997
D15-2	-15.68	Changhsingian / Changxing Fm	dark gray micritic limestone	0.3108	57.9151	-27.5	NM	NM	NM	NM	0.0804701	0.0512841	0.0408113
D15-1	-18.72	Changhsingian / Changxing Fm	dark gray micritic limestone	0.3263	91.9399	-27.8	NM	0.219436	NM	0.219436	0.0632732	0.0694064	0.0137332
D14-2	-20	Changhsingian / Changxing Fm	dark gray micritic limestone	0.32	34.0347	-26.9	NM	NM	NM	NM	0.0559153	0.0414835	0.0823342
D14-1	-20.13	Changhsingian / Changxing Fm	black siliceous limestone	1.6416	214.425	-28	0.618122	0.0570135	NM	0.0570135	0.0357968	0.0639464	0.366047
D13-2	-21.55	Changhsingian / Changxing Fm	dark gray micritic limestone	0.81	164.258	-27.6	NM	NM	NM	NM	0.043467	0.0332374	0.289915
D13-1	-24.02	Changhsingian / Changxing Fm	dark gray micritic limestone	0.2965	23.6088	-28	NM	0.563192	NM	0.563192	0.0476094	0.0320165	0.074892
D12-2	-25.95	Changhsingian / Changxing Fm	dark gray micritic limestone	3.3393	180.876	-27.4	NM	0.0197287	NM	0.0197287	0.0392478	0.0679258	0.389059
D12-1	-26.22	Changhsingian / Changxing Fm	dark gray micritic limestone	0.392	176.02	-26.8	NM	NM	0.05	0.05	0.0606294	0.0609098	0.45147
D11-2	-28.69	Changhsingian / Changxing Fm	black siliceous limestone	0.2055	29.1971	-26.8	NM	0.0726353	0.1	0.0863177	0.0558592	0.0582803	0.125007
D11-1	-31.42	Changhsingian / Changxing Fm	black siliceous limestone	0.51	80.282	-27.4	NM	NM	NM	NM	0.0733032	0.0554696	0.124092
D10-2	-31.51	Changhsingian / Changxing Fm	black limestone	0.232	30.1724	-27.9	NM	0.314993	NM	0.314993	0.102816	0.0352213	0.0281294
D10-1	-31.88	Changhsingian / Changxing Fm	black siliceous limestone	1.3528	123.448	-27.9	NM	0.195435	NM	0.195435	0.075585	0.054278	0.114068
D9-3	-32.67	Changhsingian / Changxing Fm	black siliceous shale laminae	2.6078	129.995	-29	NM	0.151557	NM	0.151557	0.0294111	0.0944083	0.277964
D9-2	-32.91	Changhsingian / Changxing Fm	black limestone	1.03	139.238	-29	NM	NM	NM	NM	0.0668847	0.0611831	0.269429
D9-1	-33.24	Changhsingian / Changxing Fm	black limestone	0.8488	129.595	-29.5	NM	0.031	NM	0.031	0.112364	0.0614937	0.238401
D8	-35.3	Changhsingian / Changxing Fm	black limestone	0.2054	63.2911	-27.4	NM	0.331479	NM	0.331479	0.0748888	0.0661253	0.16849
D8-1	-36.91	Changhsingian / Changxing Fm	black siliceous calcareous shale	3.0456	60.7434	-27.7	NM	0.0415191	NM	0.0415191	0.0941058	0.071525	0.257659
D7	-36.93	Changhsingian / Changxing Fm	black siliceous limestone	0.4897	57.1779	-27	NM	0.374212	NM	0.374212	0.136209	0.076998	0.199391
D6-2	-37.08	Changhsingian / Changxing Fm	dark gray limestone	0.3024	19.8413	-26.7	NM	0.395025	NM	0.395025	NM	0.0597038	0.032355
C6-4-3	-37.2	Changhsingian / Changxing Fm	laminated black gray limestone	0.7019	89.7564	-26.7	NM	NM	NM	NM	0.165566	0.084648	0.0498224
C6-4-2	-37.45	Changhsingian / Changxing Fm	dark gray calcareous shale	2.207	210.693	-27	NM	1.01	NM	1.00893	0.112131	0.0830979	0.224075
C6-1	-37.75	Changhsingian / Changxing Fm	dark gray siliceous shale	0.7652	154.208	-27.1	NM	1.00198	NM	1.00198	0.0882171	0.0933143	0.351517
D5/6	-37.85	Changhsingian / Changxing Fm	black shale laminae	0.3024	123.8	-26.2	NM	NM	NM	NM	0.0554632	0.0632738	0.351855
C5-10	-38.4	Changhsingian / Changxing Fm	dark gray micritic limestone	0.2145	41.958	-27.4	NM	1.84642	NM	1.84642	0.136127	0.0764984	0.11491
D4-3A	-39.7	Changhsingian / Changxing Fm	dark gray micritic limestone	0.2459	56.9337	-26.6	NM	0.886874	NM	0.886874	0.075328	0.0744826	0.183273
D4-2A	-39.95	Changhsingian / Changxing Fm	dark gray shale	1.969	227.019	-27.5	0.736914	0.587084	NM	0.587084	0.0711459	0.0781027	0.232139
D4-1	-39.99	Changhsingian / Changxing Fm	dark gray siliceous calcareous shale	3.0339	200.732	-27.8	NM	0.84012	NM	0.84012	0.121849	0.0833649	0.484953
C5-3	-41.1	Changhsingian / Changxing Fm	dark gray limestone	2.649	268.403	-26.8	0.759194	0.590953	NM	0.590953	0.128693	0.0913942	0.122262
D4-2	-41.95	Changhsingian / Changxing Fm	dark gray limestone	0.4291	83.8965	-27.2	NM	0.654746	NM	0.654746	0.110107	0.0832491	0.245895
D3	-42.02	Wuchiapingian / Longtan Fm	dark gray thin-bedded calcareous shale	3.3375	348.764	-26.7	NM	0.435488	NM	0.435488	0.1128	0.101449	0.565564
C4-1	-42.52	Wuchiapingian / Longtan Fm	black siliceous limestone	1.879	291.112	-28	NM	0.407559	NM	0.407559	0.0655202	0.0885914	0.414325
D2-2A	-42.9	Wuchiapingian / Longtan Fm	dark gray limestone	0.4486	64.6456	-25.8	0.666278	0.722887	NM	0.722887	0.0999949	0.0723902	0.112922
D2	-43.06	Wuchiapingian / Longtan Fm	dark gray limestone	0.3424	52.5701	-26.3	NM	0.593744	NM	0.593744	0.0909363	0.0973434	0.30043
C3-2	-43.5	Wuchiapingian / Longtan Fm	black thin-bedded argillaceous limestone	0.8697	200.069	-27.1	0.760179	0.87996	NM	0.87996	0.0810826	0.117018	0.116782
Notes:	The relative depth (height) of the samples is measured with the base of Bed 25 as 0.00 m.
	DBFs / aromatics = dibenzofurans / total aromatics = (C0 + C1) - dibenzofurans / (C0 + C1) - (naphthalenes + phenanthrenes + fluorenes + dibenzothiophenes + fluoranthenes + pyrenes + chrysenes + benzofluoranthenes + benzopyrenes)
	Phenols / n-alka(e)nes: calculated as (C0 + C1 + C2)-phenols) / C8 – C21 (n-alkanes + n-alkenes)
	MADAO / n-alkanes = C24 monoaromatic des-A-oleanane / (nC17 + nC18)
	NM: Not measured

## Sheet: G49123
Wang, C., and Visscher, H., 2021, A molecular biomarker for end-Permian plant extinction in South China: Geology, v. 49, https://doi.org/10.1130/G49123.1
